1 **Work-related road traffic crashes: emergence of new modes of personal journey. Analysis**  
2 **based on data from a register of road traffic crashes**

3

4 Emmanuel Fort<sup>a</sup>, Nicolas Connesson<sup>a</sup>, Julien Brière<sup>b</sup>, Amina Ndiaye<sup>a</sup>, Blandine Gadegbeku<sup>a</sup>,

5 Barbara Charbotel<sup>a,c</sup>

6

7 <sup>a</sup> Univ Lyon, Univ Gustave Eiffel, Univ Claude Bernard Lyon 1, UMRESTTE UMR T 9405, F

8 69622 Lyon, France.

9 [emmanuel.fort@univ-lyon1.fr](mailto:emmanuel.fort@univ-lyon1.fr)

10 [nicolas.connesson@gmail.com](mailto:nicolas.connesson@gmail.com)

11 [amina.ndiaye@univ-eiffel.fr](mailto:amina.ndiaye@univ-eiffel.fr)

12 [blandine.gadegbeku@univ-eiffel.fr](mailto:blandine.gadegbeku@univ-eiffel.fr)

13 [barbara.charbotel@univ-lyon1.fr](mailto:barbara.charbotel@univ-lyon1.fr)

14 <sup>b</sup>Department of Environmental and Occupational Health, Santé Publique France, French

15 National Public Health Agency, Saint Maurice, France. [julien.briere@santepubliquefrance.fr](mailto:julien.briere@santepubliquefrance.fr)

16 <sup>c</sup>CRPPE de Lyon (Regional Center for Occupational and Environmental Pathologies), Hospices

17 Civils de Lyon, Centre Hospitalier Lyon Sud, Pierre-Bénite, France.

18 Corresponding author: Emmanuel Fort

19 Univ Lyon, Univ Gustave Eiffel, Univ Claude Bernard Lyon 1, UMRESTTE UMR T 9405, F 69622

20 Lyon, France [emmanuel.fort@univ-lyon1.fr](mailto:emmanuel.fort@univ-lyon1.fr)

## 21 Abstract

22

23 **Introduction:** According to the 2018–2019 People Mobility Survey, work-related journeys  
24 (commuting and on-duty journeys) account for approximately 25% of all journeys. The use of  
25 non-motorized (nm) and motorized (m) personal mobility devices (PMDs) has steadily  
26 increased since their introduction into the French market in the last decade.

27 **Objective:** This study aimed to describe the characteristics of work-related road crashes and  
28 their evolution since the introduction of new PMDs in France and the increase in the use of  
29 scooters.

30 **Materials and methods:** This was a retrospective, cross-sectional study using data from the  
31 Rhône Road Trauma Registry. Data were collected from 2015 to 2020. We included the data  
32 for the victims aged 18–70 years who were injured in work-related road crashes.

33 **Results:** We identified 11,296 individuals aged 18–70 years who experienced work-related  
34 road crashes. An injury report was provided for a total of 11,277 patients. A total of 546  
35 passengers and 78 drivers of other motorized vehicles (buses/trams, construction  
36 equipment, and tractors) were excluded from the analysis. Seven patients died at the time of  
37 the crash, and seven died after hospitalization. Of the 10,653 (94.4%) victims, there were  
38 pedestrians (5.1%), or riders of bicycles (16.9%), scooters (3.8%), other PMDs (roller blades,  
39 skateboards, monowheels, gyropods, and hoverboards; 0.4%) and motorized two-wheeler  
40 (21.4%), or drivers of car (45.3%), and truck (1.5%). More than half of the scooter riders and  
41 80% of other PMD riders were men. More than 60% of other PMD riders and 53% of scooter  
42 riders were under 34 years of age. Most scooter road crashes occurred during commuting

43 (95.6%). Sixty-five percent of the scooter crashes and 50% of other PMD crashes did not  
44 have opponents. Overall, one-quarter of the victims experienced crashes without  
45 opponents. Most scooter riders had injuries to their upper limbs (59.2%), lower limbs  
46 (46.8%), face (21.2%) or head (17.9%).

47 **Discussion:** Most work-related road crashes were of low or moderate severity (97.5%;  
48 Maximum Abbreviated Injury Scale, MAIS score < 3). The frequency and severity of injuries  
49 among scooter and other PMD users were similar. Scooter opponents were rarely observed  
50 in pedestrian injuries (12/575). Most scooter- and other PMD-crashes did not have  
51 opponents.

52 **Conclusion:** Many head injuries could be prevented with more widespread use of helmets,  
53 among scooter- and other PMD users and bicycle users.

54 **Keywords:** scooters; personal mobility device; mobility; road crash; work-related road crash;  
55 injuries; regulations

56

57 **What is already known on this topic**

- 58
- The use of personal mobility devices (PMDs) has steadily increased in France.
- 59
- Work-related journeys (commuting and on-duty journeys) account for approximately
- 60 25% of all journeys

61

62 **What this study adds**

- 63
- We describe work-related road crashes' characteristics since PMDs' introduction.
- 64
- Work-related road crashes involving scooters or other PMDs riders are of low
- 65 severity.
- 66
- Most scooter riders had injuries to their upper limbs (59.2%), lower limbs (46.8%),
- 67 face (21.2%) or head (17.9%).

68

69 **How this study might affect research, practice or policy**

- 70
- Many head injuries could be prevented with more widespread helmet use.
- 71
- Companies can take preventive actions to ensure that employees are better
- 72 informed.

73

## 74 1. Introduction

75 While a large proportion of travel in France involves private journeys (leisure or other),  
76 work-related journeys (home-work and on-duty) account for approximately 25% according  
77 to the 2018–2019 People Mobility Survey [1]. The main modes of transportation for  
78 commuting journeys were cars (72%), public transport (12%), walking (9%), cycling (3%), and  
79 motorized two-wheelers (2%); other modes accounted for less than 1%. According to the  
80 National Transport and Mobility Survey, work-related journeys accounted for approximately  
81 27% of all journeys in 2008 [2]. The 2016 National Survey of Environmental Behavior [3]  
82 showed that 25% of journeys were mainly for commuting. According to the Sumer surveys in  
83 France, 25% of employees drive on public roads as part of their work [4,5]. This proportion  
84 has remained constant since the surveys were conducted (2003, 2010, and 2017).

85 The mode of transport to reach work depends on several factors [3]. The distance to work,  
86 availability of transportation, car ownership, household size, parking, and cost are  
87 determining factors in choosing the travel mode(s). In addition, there is a significant  
88 difference between the types of territory; walking, cycling, and other soft modes of  
89 transport are preferred in Paris and its suburbs, as well as in large cities and urban areas  
90 (those with 100,000–10,000,000 inhabitants).

91 A personal mobility device (PMD) is a class of compact micromobility vehicle for transporting  
92 an individual. It can be separated in 2 subgroups: the non-motorized personal mobility  
93 devices (nmPMDs) which can be typically scooter, roller, skateboard; and motorized  
94 personal mobility devices (mPMDs) which include electric scooter, skateboards, kick  
95 scooters, self-balancing unicycles and Segways, as well as gasoline-fueled motorized scooters  
96 or skateboards, typically using two-stroke engines of less than 49 cc (3.0 cu in) displacement

97 and which can't ride at speeds that do normally exceed 25 km/h (16 mph) or sometimes  
98 20km/h in some countries. The use of PMD has been steadily increasing, mostly since the  
99 introduction of electric scooter into the market in France in the last decade, as well as in  
100 other cities globally [6]. These modes of transport can be referred to as micromobility that  
101 combines all easy modes of transport that allow their users to make hybrid use of the vehicle  
102 either as a pedestrian or as a vehicle occupant [7]. It represents between 8–15% of daily  
103 journeys of less than 8 km, which today account for 50–60% of the distance traveled in  
104 China, the European Union, and the USA, and replaces 20% of public transport journeys (in  
105 addition to bridging the gap between the first and last kilometers) as well as bicycle, moped,  
106 scooter, or on-foot journeys [8].

107 The introduction of electric scooter sharing (in June 2018 in France) has accelerated the use  
108 of electric scooters for journeys. It has been observed in all industrialized countries, mainly  
109 in large metropolises [9]. In overall, the development of PMDs is growing, primarily in urban  
110 areas, for several reasons. First, their use could replace motorized vehicles, such as cars or  
111 motorized two-wheelers. Second, they reduce air pollution; therefore, their use is favored in  
112 cities with reserved lanes (for bicycles and PMDs) or shared lanes (usually for bicycles, PMDs,  
113 bus and taxi). Finally, the increase in the cost of fossil energy favors the development of  
114 PMDs. In fact, it appears that most walking and public transport journeys are replaced by  
115 trips using PMDs [10]. Electric scooters replace walking or biking for the last mile of a  
116 journey [11], potentially reducing the overall physical activity of the population [12]. The  
117 introduction of large low-emission zones (ZFE), where vehicle speeds are limited to 30 km/h,  
118 is a new incentive to use PMDs. The COVID-19 pandemic has increased the use of PMDs,  
119 particularly by encouraging social distancing [13]. Thus, public transport users have

120 abandoned subways, tramways, or buses, where distances between people can be too small,  
121 for the use of PMDs. However, some authors have highlighted problems caused by electric  
122 scooters, both regarding the safety of other vulnerable users and the impact on the  
123 environment during the production of scooters, especially batteries, which cause pollution  
124 [14].

125 In Vienna, Austria, Laa and Leth [15] showed that users were shifting to electric scooters,  
126 followed by buses and street cars, to replace walking. Electric scooters are used in  
127 combination with other modes of transport. A study from the USA on users of the shared-  
128 bike service in Washington, D.C. found that 35% of occasional users reported using it as a  
129 substitute for public transport [16]. In Belgium, nearly 50% of customers reported replacing  
130 one or more modes of transport with electric scooters [17].

131 PMDs now represent a significant part of urban and peri-urban transport modes. In France,  
132 22% of respondents have used them at least once, and 11% are regular users (at least once a  
133 month) [18]. The electric scooters are the most-used mPMD, followed to a lesser extent by  
134 the gyro-mot, electric skateboard, gyropod, and hoverboard. One of two daily users of  
135 mPMD uses a self-service electric scooter. In Greece, 40% of the users mentioned using  
136 electric scooters for work purposes [9]. These electric vehicles offer new opportunities to  
137 users in terms of travel speed and less effort than their non-electric counterparts; however,  
138 they cause problems with public space sharing and road safety [18].

139 Many regulations have been implemented and experiments have been conducted in cities  
140 and countries to better control the use of electric scooters [6] and reduce the injuries  
141 associated with them, such as restrictions on hiring and using electric scooters at night [19],  
142 wearing helmets, adhering to speed limits, and traffic zones [6].

143 Many studies have found an increase in injuries associated with the use of electric-sharing  
144 scooters. In USA, the estimated incidence of electric scooter injuries treated in emergency  
145 departments in the US nearly doubled between 2018 and 2019 [20]. In the United Kingdom,  
146 a case series demonstrated an increasing frequency of significant orthopedic injury  
147 associated with electric scooter use treated at a Level 1 Major Trauma Center over the  
148 course of two years [21] while a study in a trauma unit found a significant rise in electric  
149 scooter-related injuries seen between 2019 and 2020 [22]. A study about the patients  
150 attended on in an emergency room in Spain concluded that the popularization of electric  
151 scooters among the employed population has caused a high increased number of crashes in  
152 this range of age [22]. Finally, in Finland, [23] and in France [24] other studies have found an  
153 increase in injuries associated with the introduction and the use of electric-sharing scooters  
154 [25–29].

155 Thus, although this increase has not yet been quantified in mobility surveys, there has been  
156 an increase in road crashes for users. In a recent publication, the Rhône Registry reported  
157 1,186 scooter crashes, resulting in 1,197 injured users and a 7.3-fold increase in the number  
158 of scooter crashes between 2018 and 2019 [30].

159 Therefore, this study aimed to describe the characteristics of victims injured during a work-  
160 related road crash and their evolution since the emergence of PMDs, more specifically the  
161 scooters. A secondary objective was to characterize and compare crashes involving scooters  
162 and other PMDs with the usual user categories.



## 163 2. Materials and Methods

164

### 165 2.1. Design

166 This retrospective cross-sectional study used data from the Rhône Road Trauma Registry.

### 167 2.2. The Rhône Road Trauma Registry

168 The Rhône Road Trauma Registry has been recording data prospectively since its inception in  
169 1995 and covers the Rhône region (1.85 million inhabitants), including one of France's  
170 largest cities (Lyon, 0.5 million inhabitants, 11,000 inhabitants/km<sup>2</sup>) within a metropolis  
171 (Lyon Metropolis, 1.4 million inhabitants). Individuals were included in the registry if they  
172 faced a road crash involving one or more road users (motorized or not) in the Rhône region  
173 and consulted one of the 245 public or private healthcare facilities (including 42 emergency  
174 departments and 20 intensive care units within levels I, II, and III trauma centers), including  
175 pre-hospital primary care services and forensic medicine institutes.

176 The Registry collects the data on demographics of each victim, their sustained injuries, and  
177 crashes. Patient information was prospectively collected from the time of the crash to  
178 hospital discharge from prehospital emergency care, emergency departments, intensive care  
179 units, and surgical units.

180

### 181 2.3. Study population

182 Data were collected from 2015 to 2020. The victims aged 18–70 years (legal age limit for  
183 working in France for workers) who were injured on the way to/from work or while working  
184 were included in the Rhône Registry database (Figure 1). Persons without an injury were  
185 excluded because they were out of the scope of our study, as were passengers in a vehicle

186 (n=546) because they were not driver and drivers of buses/coaches/tramway (n=61) or other  
187 motorized vehicles (tractors, construction equipment, quad bikes; n=17) because they were  
188 few and with specific particularities that don't allow relevant comparisons with other users  
189 (defined paths for buses and coaches).

## 190 2.4. Variables

191 The following variables were analyzed: sex, age, category of work journey (commuting or  
192 mission), category of road user, type of road network, opponent, time of crash, month of  
193 crash, day of crash, use of adequate safety equipment, hospitalization, injuries and death at  
194 the scene or post-crash.

## 195 2.5. Gravity of the injuries

196 Each injury was coded according to the Abbreviated Injury Scale (AIS), the AIS 2005 Revision,  
197 which comprises 2,000 codes divided into nine body areas [31,32]. Each code has an  
198 associated AIS severity score ranging from 1 (minor injury) to 6 (beyond treatment/death).  
199 As a patient may have multiple injuries in the same body part, the maximum AIS (MAIS)  
200 reports the greatest severity in each injury area. Similarly, the overall MAIS score is  
201 calculated to determine the victims' overall severity of injuries. Finally, the New Injury  
202 Severity Score (NISS) was calculated from the three most severe injuries and was defined as  
203 the sum of the squares of the respective AIS [33,34]. It was then classified into 3 categories:  
204 minor trauma <9, moderate trauma (9–15), and severe trauma ≥16.

## 205 2.6. Statistical analysis

206 A descriptive analysis was conducted for the overall data and by user category (for the main  
207 categories). Seven categories of users were identified: pedestrians, bicycle riders, scooter  
208 riders, riders of other PMDs (roller blades, skateboards, hoverboards, and monowheels),

209 car/light commercial vehicle drivers, truck drivers, and motorized two-wheeler riders. We  
210 also considered these 7 categories into 2 subgroups: “soft mode transport users”  
211 (pedestrians, bicyclists, scooters, and other PMDs) and “motor vehicle users not authorized  
212 to use bicycle paths and lanes” (cars/light commercial vehicles, trucks, and motorized two-  
213 wheelers).

214 Firstly, we described the victims of the 2015-2020 register, grouped into 7 user categories  
215 according to socio-demographic characteristics (gender, age) and crash characteristics (type  
216 of commute, antagonist, month of crash,... ), with comparisons between the 7 user  
217 categories as a whole and between users belonging to 2 sub-groups, then we describe and  
218 compare the same groups according to injury characteristics (MAIS, area of injury,...), and  
219 finally we studied the trends over the 2015-2019 period.

220 Categorical variables were compared by user category using the chi-square test, and  
221 quantitative variables, using analysis of variance (ANOVA). All analyses were performed  
222 using SAS software version 9.4.

## 223 3. Results

### 224 3.1. Description of the victims of work-related road crash

225 Between 2015 and 2020, 53,487 victims were recorded in the Rhône registry, of whom  
226 approximately 82% (n=43,791) were between 18 and 70 years of age. Approximately 26%  
227 (n=11,296) of crashes were related to commutes or duty journeys.

228 Of the 11,296 victims aged 18–70 years involved in work-related road traffic crashes, 11,277  
229 had an injury report. Seven people died at the time of the crash and seven died after  
230 hospitalization.

231 We excluded 546 passengers and 78 drivers of other motorized vehicles (buses, tramways,  
232 construction equipment, and tractors) from the analysis according to the main categories of  
233 interest, resulting in 10,653 participants (94.4%). These were scooter riders (3.8%), other  
234 PMD riders (0.4%), bicycles riders (16.9%), motorized two-wheelers riders (21.4%),  
235 pedestrians (5.1%), and cars or light commercial vehicles (45.3%) and trucks (1.5%) drivers.

236 Nearly half of the scooter riders (54.8%) and more than three-quarters of other PMD riders  
237 were male (Table 1). Overall, most victims were male (60.9%), except for pedestrians (45.7%)  
238 and car occupants (47.1%).

239 Most PMD riders were under 35 years of age (60% for other PMDs and 52.7% for scooters).

240 Overall, the population was young, with 54.1% aged < 35 years, and 76.1% aged < 45 years.

241 The average age differed significantly according to the user category.

242 Most work-related scooter crashes occurred during commuting (95.6%). The reason for the  
243 journey was related to the mode of travel; 78.9% of the truck driver victims were on duty

244 and 20.7% of pedestrians were involved in the crash while on duty. Overall, 87.2% of the  
245 victims were commuters.

246 Nearly two-thirds of scooter riders and half of other PMD riders had no opponents. Overall,  
247 only 26.5% of the victims faced crashes without opponents. By definition, all the pedestrians  
248 had opponents.

249 Of the victims, 90% were involved in crashes during the week, with no difference based on  
250 the user category. Less than 25% of scooter and other PMD riders were involved in nighttime  
251 crashes. The crashes occurred at night for 29% of the victims, with a higher proportion of  
252 pedestrians (34.6%).

253 The majority of scooter, other PMD, and bicycle riders, and pedestrians were involved in  
254 crashes in street-type traffic lanes in the city. More than 45% of car and truck drivers were  
255 involved in crashes outside urban areas, whereas approximately 90% of crashes involving  
256 scooters, other PMDs, and bicycles occurred in urban areas (Lyon and its metropolitan area).

257 The use of personal protective equipment according to the user category was the highest for  
258 car drivers (97% wore a seatbelt), truck drivers (82% wore a seatbelt), and motorized two-  
259 wheeler riders (95% wore a helmet). Only one-third of injured bicycle riders wore helmets,  
260 and less than one-fifth of injured scooter and other PMD riders wore helmets.

### 261 3.2. Description of the injuries

262 Half of the riders of other PMDs had a single injury, whereas scooter riders, pedestrians, and  
263 motorized two-wheeler riders more frequently had multiple injuries (Table 2). Of the victims,  
264 41.9% had a single injury, 33.2% had two injuries, 17.8% had three injuries, and 7.1% had

265 more than four injuries. The average number of injuries differed significantly according to  
266 user category ( $p < 0.0001$ ).

267 Of the victims, 7.8% were hospitalized. This proportion was higher for pedestrians, drivers of  
268 trucks, and riders of motorized two-wheeler and other PMDs. One scooter rider died in an  
269 crash. Twelve people died from their injuries (including three pedestrians and three  
270 motorcyclists).

271 The most frequently affected body parts were the spine (37.6%), lower limbs (36.4%), upper  
272 limbs (36.1%), head (14.8%), thorax (9.3%), neck (9.7%), face (8.1%), and abdomen (3.3%).

273 Head injuries were significantly ( $p < 0.0001$ ) more common in pedestrians (20.5%), car  
274 (16.1%) and truck (26.5%) drivers and scooter (17.9%) and bicycle (15.5%) riders. Facial  
275 injuries were significantly ( $p < 0.0001$ ) more common among scooter (21.2%) and bicycle  
276 (16.5%) riders, pedestrians (12.7%), and other PMD riders (14.0%). Neck injuries were  
277 significantly ( $p < 0.0001$ ) more common among truck (23.9%) and car (15.5%) drivers. Chest  
278 injuries were significantly ( $p < 0.0001$ ) more common among truck (15.7%) and car (14.7%)  
279 drivers, pedestrians (11.6%), and two-wheeler riders (11.2%). Abdominal injuries were more  
280 common among pedestrians (5.7%) and motorized two-wheeler riders (4.7%). Spinal injuries  
281 were significantly ( $p < 0.0001$ ) more common among car (60.9%) and truck (42.2%) drivers,  
282 and pedestrians (20.7%) than among other users. Upper extremity injuries were significantly  
283 ( $p < 0.0001$ ) more common among riders of scooters (59.2%), bicycles (56.9%), motorized  
284 two-wheelers (48.1%), and other PMDs (48.0%), and pedestrians (40.0%). Finally, lower limb  
285 injuries were significantly ( $p < 0.0001$ ) more common among riders of motorized two-  
286 wheelers (68.5%), other PMDs (52.0%), bicycles (47.1%) and scooters (46.8%).

287 Only 2.1% of scooter riders were seriously injured (MAIS 3+). Overall, 97.5% of the victims  
288 were slightly injured (MAIS <3). The proportion of serious injuries (MAIS 3+) was higher  
289 among pedestrians (6.6%), other PMD riders (8%), and motorized two-wheeler riders (4.5%).  
290 Differences between global severity and categories of user injured were significant  
291 ( $p < 0.0001$ ).

292 Facial injuries were minor for all crash victims, except for 4% of pedestrians who had injuries  
293 of MAIS 3+. Among scooter and other PMD riders, all upper-extremity injuries were of low  
294 severity (MAIS <3). However, three riders of other PMD had lower extremity injuries of MAIS  
295  $\geq 3$ .

296

### 297 3.3. Trends in work-related road crashes during 2015–2019

298 Between 2015 and 2019, an increase in the number of work-related traffic injuries has been  
299 observed (28.2%), mainly due to an increase in the number of crashes while commuting  
300 (36.3%) and a decrease of the number of crashes on duty (6.9%); 2020, the year of the  
301 COVID-19 pandemic, was characterized by a break in this increase (Figure 2).

302 Between 2015 and 2019, the number of scooter riders increased by 773%, that of other PMD  
303 by 200%, that of bicycles by 92.1%, that of pedestrian by 33.3% and that of car by 18.3%  
304 (Figure 3). In contrast, the number of motorized two-wheeler riders decreased by 5.9%, and  
305 that of truck drivers was stable.

306

## 307 4. Discussion

### 308 4.1. Main findings

309 This original study on work-related road crashes allowed us to characterize the increase in  
310 work-related road crashes associated with new modes of travel, particularly scooters. This  
311 new mode of travel has been constantly increasing for approximately 10 years and even  
312 more since the emergence of shared electric scooters. Companies in Lyon have offered this  
313 service since 2018. Its use accelerated following the COVID-19 pandemic. The results of this  
314 study showed that for work-related trips, the proportion scooter riders increased by 773%  
315 between 2015 and 2019, and car crashes users increased only by 18.3% in 2020. Bagou et al.  
316 [30] found a seven-times increase in scooter crash victims between 2018 and 2019 in the  
317 Rhône Department. In contrast, the proportion of car drivers decreased in 2020 due to  
318 COVID-19 pandemic-related restrictions [35].

319 Most work-related road crashes were commuting crashes. Among people working in a fixed  
320 and regular place outside the home (i.e., approximately 79% of employed people),  
321 approximately 29% make two or more home-to-work trips [2]. This proportion is inversely  
322 correlated with commuting journey time. Approximately 25% of employees are exposed to  
323 driving as part of their work activities [4,5].

324 However, only a small proportion of scooter riders (4.4%) were involved in a road crash on  
325 duty, while 95.6% of scooter riders had a road crash on commuting. Either their use is  
326 reserved for home-work trips or people using this mode of transport have less risky behavior  
327 when it comes to a trip within the framework of their professional activity.

328



## 329 4.2. Characterization of users of nmPMD/mPMD who had road crash

330 A prospective study in Spain also characterized electric scooter crashes [36]: women  
331 represented 40% of the injured, and approximately 13% of the injured were under 18 years  
332 of age. In Austria, two-thirds of the injuries involved men, and 60% of the crashes occurred  
333 at night [37]. In Denmark, the majority of injured electric scooter riders were 18-25 years  
334 old. The proportion of pedestrians injured by an electric scooter was 17% in crashes  
335 involving scooters [38]. A recent German study observed a two-thirds were men, and  
336 nighttime crashes [39]. In another study, Graef et al. [40] observed that among patients  
337 admitted to a level 1 trauma center with a mean age of 30 years, 44% were female. In Italy,  
338 patients involved in electric scooter crashes were predominantly male (79%) with an average  
339 age of 30 years [41]. In an annual incidence study of patients with injuries related to the use  
340 of electric scooters in the USA, 60% of the victims were men and 92% were riders [42]. In  
341 Germany, following the implementation of the first registry to examine injury patterns and  
342 collect epidemiological data on people injured while riding electric scooters, Heuer et al. [43]  
343 described injuries in 90 patients (65% male; mean age, 35 years).

344 An early review of the literature on electric scooters provided insights into the circumstances  
345 and consequences of electric scooter crashes [44]. The majority of these crashes occur  
346 without an opponent and as a result of a fall, collision with an object, excessive speed, or  
347 unfavorable road conditions. Nikiforiadis et al. [9] found that electric scooter traffic on  
348 sidewalks affected pedestrian experiences the most, ahead of uncontrolled parking on  
349 sidewalks. The speed of scooters leads to feelings of insecurity among pedestrians. However,  
350 the results of this study showed that scooter opponents were rarely observed among injured  
351 pedestrian (12/575). According to a study by Shichman et al. [29], which compared crashes

352 involving electric scooters before and after the introduction of electric- sharing scooters,  
353 80% of the injuries were due to falls. Sixty percent of the scooter riders in our study did not  
354 have an opponent and thus, were likely to have fallen in the crash; this proportion was 80%  
355 for riders of other PMD.

356 According to a German study, PMD riders perform secondary tasks while riding [45]. More  
357 than 13% of bicycle and electric scooter riders in Germany performed secondary tasks, such  
358 as wearing headphones or earphones and chatting with another user. However, the use of  
359 cell phones was rare. Riders with a delivery task using a PMD as part of their activities were  
360 at higher risk of performing secondary tasks in addition to driving [45]. This observational  
361 study found that delivery riders were most likely to wear headphones or earphones;  
362 however, they did not show significantly more traffic violations, inappropriate use of  
363 roadway infrastructure, or at-fault crashes.

364

### 365 4.3. Injuries related to PMD

366 Most crashes were of low or moderate severity (97.5% MAIS < 3). In the context of work-  
367 related road crashes, the frequency of injuries among scooter riders and other PMDs was  
368 similar according to the different injury areas and severity. Work-related crashes are  
369 generally less severe than private crashes [46].

370 The upper limbs, lower limbs, face and head were the main areas injured by scooter riders.  
371 This finding is consistent with those of other studies. In an Italian study, nearly 47% of the  
372 injuries were fractures, with the majority being radial fractures and 25% requiring surgical  
373 intervention [36]. In a South Korean study [47], the main anatomical region affected in

374 electric scooter crash victims was the face, followed by the head and upper extremities. In  
375 an annual incidence study on patients with injuries related to electric scooter use in the USA  
376 [42], the most common injuries were fractures and head injuries. In Germany, among 90  
377 people injured while riding electric scooters, 32 fractures and seven ligament injuries were  
378 reported, and head injuries were found in 38 patients [43]. Moftakhar et al. [37] studied the  
379 severity of injuries caused by electric scooter crashes in Austria. These crashes occurred at  
380 high kinetic energies and caused head and upper extremity injuries. In Germany, following  
381 the introduction of shared electric scooters in 2019, the topic of safety emerged as a public  
382 debate. A recent study [39] reported that electric scooter crashes were the source of serious  
383 injuries, with 28% of crash victims requiring surgical management. In another study, Graef et  
384 al. [40] observed that more than two-thirds of patients had extremity injuries, and half had  
385 facial injuries. The chest region exhibited the highest AIS scores. Overall, 70% of the injuries  
386 were minor. Finally, in Italy, among patients involved in electric scooter crashes [41], 60%  
387 had a head injury, 30% were transported to emergency departments for life-threatening  
388 injuries, and 15% were placed in intensive care units.

389 The fact that not all scooter riders used electric scooters in our study minimized the severity  
390 of the crashes. Shichman et al. [29] studied crashes involving electric scooters before and  
391 after the introduction of shared electric scooters and showed a significant increase in  
392 electric scooter-related injuries during emergency department visits after the introduction of  
393 sharing services (six times more admissions).

394 Compared to non-electric scooter riders, electric scooter riders suffered more bruises and  
395 lacerations on the face, required sutures, and were more often under the influence of  
396 alcohol or drugs [38].

#### 397 4.4. Protective equipment for PMD users

398 Although seatbelt use among car and truck drivers and helmet use among motorized two-  
399 wheeler riders are very high in the context of work travel, the results indicate that helmet  
400 use among bicycles, scooters, and other PMD riders is low. This has also been found in other  
401 studies in the general population. Helmet use among electric scooter users was anecdotal in  
402 a German study [39], only one out of 43 patients wore a helmet in another German study  
403 [40], and 4% of victims wore a helmet in a study in Dallas, USA [48].

404 Helmet use for electric scooter users significantly reduces the risk of serious head and facial  
405 injuries [49], maxillofacial fractures, and soft tissue injuries [50]. Similar to the  
406 recommendations for helmet use for bicycle users 10 years ago, the scientific literature  
407 confirms and recommends helmet use for electric scooter users and, in a larger set, for users  
408 of PMDs [51,52]. The non-use of helmets by electric scooter users and the high prevalence of  
409 head injuries found in numerous studies [44,53] suggest that these types of injuries may be  
410 preventable. Studies demonstrating the effectiveness of helmet use among cyclists can  
411 confirm this [54]. As highlighted in this literature review, several cities (Brisbane,  
412 Copenhagen, Dallas, Los Angeles, Malaga Paris, Stockolm, and Vienna) and countries (France  
413 and Italy) [55,56] have legislated this area [6]. However, results from an Australian study  
414 showed that helmet use among commercial shared electric scooter riders was only 60%  
415 whereas 95% of private electric scooter riders wore a helmet [57]. It is necessary to ensure  
416 that helmets remain available for the commercial shared e--scooters riders or encourage  
417 these users to bring their own helmet. Finally, helmet is the least restrictive and most  
418 practical form of safety protection.

419 In order to reduce the risk of injury to upper and lower limbs, several other protective  
420 equipments could be used by scooter and other PMDs riders like gloves, jackets with  
421 protection or pants. These protective equipments increase the safety of motorized two-  
422 wheeler riders. However, it seems difficult to ask scooter riders to wear protective  
423 equipment as if they were motorized two-wheelers if wearing a helmet doesn't seem to be a  
424 priority for them already.

425

#### 426 4.5. Regulations for PMD users

427 In France, a user of rollerblades, skateboards, or scooters (without a motor) is considered a  
428 pedestrian who must ride on the sidewalk. Electrical PMDs (scooters, hoverboards,  
429 gyropods, monowheels) must be used on the bicycle path, if available. Bicycles must be on a  
430 roadway or bike path, if there is one.

431 The Mobility Law 2019 [58] established that electric scooters are prohibited on sidewalks  
432 (unless authorized by the mayor and unless the engine is turned off). In built-up areas, traffic  
433 is only authorized on bicycle paths or, failing that, on roads with a maximum speed limit of  
434 50 km/h. Outside built-up areas, traffic is authorized only on bicycle paths or greenways  
435 (except for exemptions). Electric scooters are prohibited for children under 12 years of age.  
436 Wearing a helmet is mandatory for minors over 12 years of age and strongly recommended  
437 for adults. Civil insurance is mandatory. Riding an electric scooter at speeds exceeding 25  
438 km/h is forbidden. Similar to other means of transportation, the use of headphones is  
439 prohibited. Front and rear lights are mandatory, as is wearing a retroreflective vest at night  
440 or during low visibility. A horn is mandatory. Finally, passenger transport is prohibited. The

441 regulations mandate fines: 135 euros for driving on sidewalks, 35 euros for failure to comply  
442 with traffic laws, and 1,500 euros for exceeding the authorized speed limit [59].

443 The various regulations on PMDs established by European countries are recent and  
444 heterogeneous [60]. Regulations regarding helmet use, specific categories of electric  
445 scooters, authorized bike lanes, authorized pedestrian lanes, and age restrictions vary by  
446 country. However, the maximum speed limit is a common rule except in Hungary. France  
447 and Germany require liability insurance. In the USA, regulations differ by state [56,61].  
448 Overall, many countries are yet to establish the legal requirements of this mode of travel in  
449 detail, and more specific legislation is required. In January 2017, the Singaporean  
450 government passed the Active Mobility Act (AMA) to regulate the use of PDMs. However, an  
451 increase in injuries related to these new travel modes has been observed [62].

452 Road unsafety related to electric bikes/motorcycles is becoming increasingly problematic  
453 owing to their growing popularity compared with other two-wheeled vehicles [63].

454 The majority of studies on the subject have confirmed that men and users between the ages  
455 of 18 and 34 years are most concerned with the use of and crashes involving private or  
456 shared PMDs.

457 In France, one of the few studies on this subject compared the demographic characteristics  
458 of users sharing electric scooters with those of personal electric scooters [64]. The latter are  
459 more likely to be men, older, and have a higher income. Therefore, the use of electric  
460 scooters is motivated by saving time, rather than financial reasons. They also seem to have  
461 less risky behaviors, particularly with regard to alcohol consumption, than other electric

462 scooter users [7]. A comparison of the frequency of use (occasional versus frequent users)  
463 shows that frequent users have riskier behaviors, perhaps because of their habit of use.

#### 464 4.6. Limitations of the study

465 Difficulties in correctly identifying nmPMDs were noted. The Rhône Road Trauma Registry  
466 collection form evolved in November 2019 to better quantify electric vehicle-related  
467 crashes. A "No/Yes" checkbox was introduced for the retrieval of mPMD with certainty, but  
468 it does not distinguish nmPMD from missing data.

469 The analyzed period ended at the start of the COVID-19 pandemic. The year 2020 differed  
470 from previous years in that car crashes decreased and scooter crashes increased. It will be  
471 relevant to conduct another study spanning a few more years to better measure the impact  
472 of nmPMD and mPMD on work-related traffic crashes.

473 A limitation concerns the geographic area of the study which is the Rhône department of  
474 France. Even if data from the Road Trauma Registry are usually used to perform official  
475 statistics of road crashes in France [65] because French Police crash data, are incomplete  
476 and biased [66], we cannot fully assert that a bias does not exist for work-related road crash  
477 in this data.

### 478 5. Conclusion

- 479 • This is the first study describing work-related traffic crashes that have occurred since  
480 the emergence of PMDs.
- 481 • The results observed for users of scooters and other PMDs in this study were  
482 generally consistent with those found in the scientific literature. However, in most  
483 available studies, the type of travel was not restricted to work-related journeys: a  
484 young and predominantly male population, crashes mostly without opponents.

- 485       • Most scooter and other PMD riders had injuries to their upper limbs (59.2%), lower  
486       limbs (46.8%), face (21.2%) or head (17.9%).
- 487       • Despite limited data, the results suggest that crashes involving scooters or other  
488       PMDs are of low severity. Many head injuries could be prevented with more  
489       widespread helmet use.
- 490       • The use of protective equipment like helmet is essential and not very burdensome  
491       and should be mandatory for PMDs and bicycle riders.
- 492       • Finally, companies can take preventive actions so that employees using these modes  
493       of transport for work-related journeys are better informed about the risks.

494

#### 495   **Acknowledgments**

496   We would like to thank all those involved in data collection and computerization, through  
497   the Association pour le registre des victimes d'accidents de la circulation du Rhône (Arvac,  
498   chaired by Étienne Javouhey) and the Université Gustave-Eiffel-TS2-Umrestte (under the  
499   direction of Barbara Charbotel).

#### 500   **Funding**

501   This work was supported by The French National Public Health Agency (Santé publique  
502   France) and The Rhône-Alpes retirement and occupational health funds (Carsat Rhône  
503   Alpes).

504

#### 505   **Declaration of Interest(s)**



506 None

507

508 **Data Statement**

509 Data may be obtained from a third party and are not publicly available.

510

511 **Research ethics**

512 The Rhône Road Trauma Registry has been qualified by the Registry Evaluation Committee

513 (CER) and it has been approved by the National Commission on Informatics and Liberty

514 (CNIL).

## 515 References

- 516 1 Ministère de la Transition écologique et de la Cohésion des territoires ,. Comment les  
517 Français voyagent-ils en 2019? Résultats de l'enquête mobilité des personnes. 2019.  
518 [https://www.statistiques.developpement-durable.gouv.fr/comment-les-francais-](https://www.statistiques.developpement-durable.gouv.fr/comment-les-francais-voyagent-ils-en-2019-resultats-de-lenquete-mobilite-des-personnes)  
519 [voyagent-ils-en-2019-resultats-de-lenquete-mobilite-des-personnes](https://www.statistiques.developpement-durable.gouv.fr/comment-les-francais-voyagent-ils-en-2019-resultats-de-lenquete-mobilite-des-personnes) (accessed 18  
520 January 2023)
- 521 2 Service de l'Observation et des Statistiques ,. La mobilité des Français, panorama issu  
522 de l'enquête nationale transports et déplacements 2008. 2010.  
523 [https://www.statistiques.developpement-durable.gouv.fr/sites/default/files/2018-](https://www.statistiques.developpement-durable.gouv.fr/sites/default/files/2018-11/La_mobilite_des_Francais_ENTD_2008_revue_cle7b7471.pdf)  
524 [11/La\\_mobilite\\_des\\_Francais\\_ENTD\\_2008\\_revue\\_cle7b7471.pdf](https://www.statistiques.developpement-durable.gouv.fr/sites/default/files/2018-11/La_mobilite_des_Francais_ENTD_2008_revue_cle7b7471.pdf) (accessed 18 January  
525 2023)
- 526 3 Pautard É. Les Français et la mobilité durable: quelle place pour les déplacements  
527 alternatifs à la voiture individuelle en 2016? 2016.  
528 [https://www.statistiques.developpement-durable.gouv.fr/sites/default/files/2018-](https://www.statistiques.developpement-durable.gouv.fr/sites/default/files/2018-10/Datalab-essentiel-36-les-francais-et-la-mobilite-durable-septembre2016.pdf)  
529 [10/Datalab-essentiel-36-les-francais-et-la-mobilite-durable-septembre2016.pdf](https://www.statistiques.developpement-durable.gouv.fr/sites/default/files/2018-10/Datalab-essentiel-36-les-francais-et-la-mobilite-durable-septembre2016.pdf)  
530 (accessed 18 January 2023)
- 531 4 Fort E, Ndagire S, Gadegbeku B, *et al.* Working conditions and occupational risk  
532 exposure in employees driving for work. *Accid Anal Prev.* 2016;89:118–27.
- 533 5 Fort E, Gadegbeku B, Gat E, *et al.* Working conditions and risk exposure of employees  
534 whose occupations require driving on public roads – Factorial analysis and  
535 classification. *Accid Anal Prev.* 2019;131:254–67.
- 536 6 Gössling S. Integrating e-scooters in urban transportation: Problems, policies, and the  
537 prospect of system change. *Transp Res D Transp Environ.* 2020;79:102230.
- 538 7 Christoforou Z, Gioldasis C, de Bortoli A, *et al.* Who is using e-scooters and how?  
539 Evidence from Paris. *Transp Res D Transp Environ.* 2021;92:102708.
- 540 8 Heineke K, Kloss B, Scurtu D, *et al.* Micromobility's 15,000-mile checkup. 2019.
- 541 9 Nikiforiadis A, Paschalidis E, Stamatiadis N, *et al.* Analysis of attitudes and engagement  
542 of shared e-scooter users. *Transp Res D Transp Environ.* 2021;94:102790.
- 543 10 6t-bureau de recherche. Usages et usagers des trottinettes électriques en free-floating  
544 en france. 2019. [https://cvip.sphinxonline.net/SurveyServer/s/6t-bureau/trottinettes-](https://cvip.sphinxonline.net/SurveyServer/s/6t-bureau/trottinettes-freefloating/questionnaire.htm)  
545 [freefloating/questionnaire.htm](https://cvip.sphinxonline.net/SurveyServer/s/6t-bureau/trottinettes-freefloating/questionnaire.htm) (accessed 1 March 2023)
- 546 11 Sanders RL, Branion-Calles M, Nelson TA. To scoot or not to scoot: Findings from a  
547 recent survey about the benefits and barriers of using E-scooters for riders and non-  
548 riders. *Transp Res Part A Policy Pract.* 2020;139:217–27.
- 549 12 Glenn J, Bluth M, Christianson M, *et al.* Considering the Potential Health Impacts of  
550 Electric Scooters: An Analysis of User Reported Behaviors in Provo, Utah. *International*  
551 *Journal of Environmental Research and Public Health* 2020, Vol 17, Page 6344.  
552 2020;17:6344.

- 553 13 Fédération Française de l'Assurance (FFA), Assurance Prévention, Fédération  
554 des Professionnels de la Micro-Mobilité (FP2M), Usages, risques et accidentalité des  
555 Engins de Déplacement Personnel Motorisés (EDPM), avant et après le confinement.  
556 2020. [https://www.assurance-prevention.fr/nos-etudes/engins-deplacement-](https://www.assurance-prevention.fr/nos-etudes/engins-deplacement-personnel-motorises-edpm-usages-risques-accidentalite)  
557 [personnel-motorises-edpm-usages-risques-accidentalite](https://www.assurance-prevention.fr/nos-etudes/engins-deplacement-personnel-motorises-edpm-usages-risques-accidentalite) (accessed 18 January 2023)
- 558 14 Echeverría-Su M, Huamanraime-Maquín E, Cabrera FI, *et al.* Transitioning to  
559 sustainable mobility in Lima, Peru. Are e-scooter sharing initiatives part of the problem  
560 or the solution? *Sci Total Environ.* 2023;866. doi: 10.1016/J.SCITOTENV.2022.161130
- 561 15 Laa B, Leth U. Survey of E-scooter users in Vienna: Who they are and how they ride. *J*  
562 *Transp Geogr.* 2020;89:102874.
- 563 16 Buck D, Buehler R, Happ P, *et al.* Are Bikeshare Users Different from Regular Cyclists?:  
564 A First Look at Short-Term Users, Annual Members, and Area Cyclists in the  
565 Washington, D.C., Region. <https://doi.org/10.1016/j.tran.2013.11.009>. 2013;112–9.
- 566 17 Lefrancq M. Shared freefloating micromobility regulations and results of scooter  
567 users' survey (summer 2019). *ERSCharter Webinar: e scooters.* 2019.  
568 [https://erscharter.eu/sites/default/files/resources/presentation\\_martin\\_lefrancq.pdf](https://erscharter.eu/sites/default/files/resources/presentation_martin_lefrancq.pdf)  
569 (accessed 29 March 2022)
- 570 18 Zagorskas J, Burinskiene M. Challenges Caused by Increased Use of E-Powered  
571 Personal Mobility Vehicles in European Cities. *Sustainability* 2020, Vol 12, Page 273.  
572 2019;12:273.
- 573 19 Anderson B, Rupp JD, Moran TP, *et al.* The Effect of Nighttime Rental Restrictions on E-  
574 Scooter Injuries at a Large Urban Tertiary Care Center. *International Journal of*  
575 *Environmental Research and Public Health* 2021, Vol 18, Page 10281. 2021;18:10281.
- 576 20 Farley KX, Aizpuru M, Wilson JM, *et al.* Estimated Incidence of Electric Scooter Injuries  
577 in the US From 2014 to 2019. *JAMA Netw Open.* 2020;3:e2014500.
- 578 21 Pepper T, Barker M, Smyth D, *et al.* Electric scooters: a quick way to get to the  
579 emergency department? *Br Dent J.* 2022;232:535–7.
- 580 22 Hourston GJM, Ngu A, Hopkinson-Woolley J, *et al.* Orthopedic injuries associated with  
581 use of electric scooters in the UK: A dangerous trend? Case series and review of the  
582 literature. *Traffic Inj Prev.* 2021;22:242–5.
- 583 23 Bascones K, Maio Méndez TE, Yañez Siller FA. [Translated article] E-scooter accidents:  
584 A new epidemic. *Rev Esp Cir Ortop Traumatol.* Published Online First: February 2022.  
585 doi: 10.1016/J.RECOT.2022.02.001
- 586 24 Suominen EN, Sajanti AJ, Silver EA, *et al.* Alcohol intoxication and lack of helmet use  
587 are common in electric scooter-related traumatic brain injuries: a consecutive patient  
588 series from a tertiary university hospital. *Acta Neurochir (Wien).* 2022;164:643–53.
- 589 25 Hennocq Q, Schouman T, Khonsari RH, *et al.* Evaluation of Electric Scooter Head and  
590 Neck Injuries in Paris, 2017-2019. *JAMA Netw Open.* 2020;3. doi:  
591 10.1001/JAMANETWORKOPEN.2020.26698

- 592 26 Badeau A, Carman C, Newman M, *et al.* Emergency department visits for electric  
593 scooter-related injuries after introduction of an urban rental program. *Am J Emerg*  
594 *Med.* 2019;37:1531–3.
- 595 27 Beck S, Barker L, Chan A, *et al.* Emergency department impact following the  
596 introduction of an electric scooter sharing service. *Emerg Med Australas.* 2020;32:409–  
597 15.
- 598 28 Mair O, Wurm M, Müller M, *et al.* E-scooter accidents and their consequences: First  
599 prospective analysis of the injury rate and injury patterns in the urban area of  
600 a German city with over 1 million residents. *Unfallchirurg.* 2021;124:382–90.
- 601 29 Mitchell G, Tsao H, Randell T, *et al.* Impact of electric scooters to a tertiary emergency  
602 department: 8-week review after implementation of a scooter share scheme. *EMA -*  
603 *Emergency Medicine Australasia.* 2019;31:930–4.
- 604 30 Shichman I, Shaked O, Factor S, *et al.* Emergency department electric scooter injuries  
605 after the introduction of shared e-scooter services: A retrospective review of 3,331  
606 cases. *World J Emerg Med.* 2022;13:5–10. [https://doi.org/10.5847/WJEM.J.1920-](https://doi.org/10.5847/WJEM.J.1920-8642.2022.002)  
607 8642.2022.002
- 608 31 Bagou G, Ndiaye A, Hugenschmitt D, *et al.* Traumatismes consécutifs aux accidents de  
609 trottinettes. *Annales françaises de médecine d'urgence.* 2021;11:144–9.
- 610 32 Salottolo K, Settell A, Uribe P, *et al.* The impact of the AIS 2005 revision on injury  
611 severity scores and clinical outcome measures. *Injury.* 2009;40:999–1003.
- 612 33 Association for the Advancement of Automotive Medicine. The Abbreviated Injury  
613 Scale 2005—Update 2008. Association for the Advancement of Automotive Medicine  
614 Barrington, IL 2008.
- 615 34 Koch M, Nygren A, Tingvall C. Validation of the new injury impairment scale (IIS). In:  
616 AAAM, ed. *38th AAAM conference.* Lyon, France: AAAM 1994:123–38.
- 617 35 Li H, Ma YF. New injury severity score (NISS) outperforms injury severity score (ISS) in  
618 the evaluation of severe blunt trauma patients. *Chinese Journal of Traumatology.*  
619 2021;24:261–5.
- 620 36 Laumon B, Tardy H, Ndiaye A, *et al.* Traumatologie routière pendant la première  
621 période de confinement pour cause de pandémie de Covid-19 – Registre du Rhône.  
622 *Bull Épidémiol Hebd.* 2022;18:308–14.
- 623 37 Toofany M, Mohsenian S, Shum LK, *et al.* Injury patterns and circumstances associated  
624 with electric scooter collisions: A scoping review. *Injury Prevention.* 2021;27:490–9.  
625 <https://doi.org/10.1136/injuryprev-2020-044085>
- 626 38 Coelho A, Feito P, Corominas L, *et al.* Electric scooter-related injuries: A new epidemic  
627 in orthopedics. *J Clin Med.* 2021;10. doi: 10.3390/jcm10153283
- 628 39 Moftakhar T, Wanzel M, Vojcsik A, *et al.* Incidence and severity of electric scooter  
629 related injuries after introduction of an urban rental programme in Vienna: a  
630 retrospective multicentre study. *Arch Orthop Trauma Surg.* 2021;141:1207–13.

- 631 40 Blomberg SNF, Rosenkrantz OCM, Lippert F, *et al.* Injury from electric scooters in  
632 Copenhagen: a retrospective cohort study. *BMJ Open*. 2019;9. doi: 10.1136/BMJOPEN-  
633 2019-033988
- 634 41 Störmann P, Klug A, Nau C, *et al.* Characteristics and injury patterns in electric-scooter  
635 related accidents—A prospective two-center report from Germany. *J Clin Med*. 2020;9.  
636 doi: 10.3390/jcm9051569
- 637 42 Graef F, Doll C, Niemann M, *et al.* Epidemiology, Injury Severity, and Pattern of  
638 Standing E-Scooter Accidents: 6-Month Experience from a German Level I Trauma  
639 Center. *Clin Orthop Surg*. 2021;13:443–8.
- 640 43 Scquizzato T, Gamberini L, Stella F, *et al.* Analysis of road traffic accidents involving  
641 standing electric scooters reported in newspapers in Italy. *Clin Exp Emerg Med*.  
642 2022;9:36–40.
- 643 44 Trivedi TK, Liu C, Antonio ALM, *et al.* Injuries Associated With Standing Electric Scooter  
644 Use. *JAMA Netw Open*. 2019;2:e187381.
- 645 45 Heuer S, Landschoof S, Kornherr P, *et al.* Epidemiology and Injury Pattern of E-Scooter  
646 Injuries - Initial Results. *Z Orthop Unfall*. Published Online First: 3 May 2021. doi:  
647 10.1055/a-1419-0584
- 648 46 Huemer AK, Banach E, Bolten N, *et al.* Secondary task engagement, risk-taking, and  
649 safety-related equipment use in German bicycle and e-scooter riders - An observation.  
650 *Accid Anal Prev*. 2022;172:106685.
- 651 47 Charbotel B, Martin JL, Chiron M. Work-related versus non-work-related road  
652 accidents, developments in the last decade in France. *Accid Anal Prev*. 2010;42:604–  
653 11.
- 654 48 Choi JH, Oh SS, Kim KS, *et al.* Electric Scooter-Related Trauma in Korea. *J Korean Med*  
655 *Sci*. 2022;37. doi: 10.3346/JKMS.2022.37.E181
- 656 49 Trivedi B, Kesterke MJ, Bhattacharjee R, *et al.* Craniofacial Injuries Seen With the  
657 Introduction of Bicycle-Share Electric Scooters in an Urban Setting. *Journal of Oral and*  
658 *Maxillofacial Surgery*. 2019;77:2292–7.
- 659 50 Hamzani Y, Bar Hai D, Cohen N, *et al.* The impact of helmet use on oral and  
660 maxillofacial injuries associated with electric-powered bikes or powered scooter: a  
661 retrospective cross-sectional study. *Head Face Med*. 2021;17. doi: 10.1186/S13005-  
662 021-00288-W
- 663 51 Al Saffar MMA, Verdonschot RJCG, Stassen HS, *et al.* The Association of Helmet Use  
664 with the Occurrence of Maxillofacial Injuries Following Bicycle or Scooter Accidents: A  
665 Retrospective Cohort Study. *Craniofacial Trauma Reconstr*. 2022;15:21–7.
- 666 52 Dimaggio CJ, Bukur M, Wall SP, *et al.* Injuries associated with electric-powered bikes  
667 and scooters: Analysis of US consumer product data. *Injury Prevention*. Published  
668 Online First: 2019. doi: 10.1136/injuryprev-2019-043418

- 669 53 Lin S, Goldman S, Peleg K, *et al.* Dental and maxillofacial injuries associated with  
670 electric-powered bikes and scooters in Israel: A report for 2014-2019. *Dental*  
671 *Traumatology*. 2020;36:533–7.
- 672 54 Toofany M, Mohsenian S, Shum LK, *et al.* Systematic review Injury patterns and  
673 circumstances associated with electric scooter collisions: a scoping review. *Inj Prev*.  
674 2021;0:1–10.
- 675 55 Olivier J, Creighton P. Bicycle injuries and helmet use: a systematic review and meta-  
676 analysis. *Int J Epidemiol*. 2017;46:278–92.
- 677 56 La Torre G, Van Beeck E, Bertazzoni G, *et al.* Head injury resulting from scooter  
678 accidents in Rome: Differences before and after implementing a universal helmet law.  
679 *Eur J Public Health*. 2007;17:607–11.
- 680 57 Peng Y, Vaidya N, Finnie R, *et al.* Universal Motorcycle Helmet Laws to Reduce Injuries:  
681 A Community Guide Systematic Review. *Am J Prev Med*. 2017;52:820–32.
- 682 58 Haworth NL, Schramm A. Illegal and risky riding of electric scooters in Brisbane. *Med J*  
683 *Aust*. 2019;211:412–3.
- 684 59 Décret n° 2019-1082 du 23 octobre 2019 relatif à la réglementation des engins de  
685 déplacement personnel. JORF n°0249 du 25 octobre 2019 2019.  
686 <https://www.legifrance.gouv.fr/loda/id/JORFTEXT000039272656> (accessed 12 January  
687 2023)
- 688 60 La nouvelle réglementation pour les Engins de Déplacements Personnels motorisés  
689 (EDPM) | Cerema. [https://www.cerema.fr/fr/actualites/nouvelle-reglementation-](https://www.cerema.fr/fr/actualites/nouvelle-reglementation-engins-deplacements-personnels)  
690 [engins-deplacements-personnels](https://www.cerema.fr/fr/actualites/nouvelle-reglementation-engins-deplacements-personnels)
- 691 61 Serra GF, Fernandes FAO, Noronha E, *et al.* Head protection in electric micromobility: A  
692 critical review, recommendations, and future trends. *Accid Anal Prev*. 2021;163. doi:  
693 10.1016/J.AAP.2021.106430
- 694 62 The 2022 Comprehensive Guide to Electric Scooter Laws.  
695 [https://unagiscooters.com/scooter-articles/the-comprehensive-guide-to-electric-](https://unagiscooters.com/scooter-articles/the-comprehensive-guide-to-electric-scooter-laws-2022/)  
696 [scooter-laws-2022/](https://unagiscooters.com/scooter-articles/the-comprehensive-guide-to-electric-scooter-laws-2022/) (accessed 2 March 2023)
- 697 63 Lee W, Goo T, Lim W, *et al.* Hospital seeing more personal mobility device accidents  
698 and serious injuries despite active mobility act. *J Emerg Trauma Shock*. 2020;13:274–8.
- 699 64 Zhang X, Yang Y, Yang J, *et al.* Road traffic injuries among riders of electric bike/electric  
700 moped in southern China. *Traffic Inj Prev*. 2018;19:417–22.
- 701 65 Gioldasis C, Christoforou Z, Seidowsky R. Risk-taking behaviors of e-scooter users: A  
702 survey in Paris. *Accid Anal Prev*. 2021;163. doi: 10.1016/J.AAP.2021.106427
- 703 66 Amoros E, Martin J-L, Laumon B. Estimating non-fatal road casualties in a large French  
704 county, using the capture-recapture method. *Accid Anal Prev*. 2007;39:483–90.
- 705 67 Amoros E, Martin JL, Laumon B. Under-reporting of road crash casualties in France.  
706 *Accid Anal Prev*. 2006;38:38(4):627-35.

Table 1: Socio-demographic and characteristics of the crash of victims injured in work-related crash, by user category (source the Rhône Road Trauma Registry, 2015-2020)

|                                     | Pedestrian<br>(n=575) | Bicycle rider<br>(n=1 908) | Scooter<br>rider<br>(n=429) | Other PMD<br>rider<br>(n=50) |                      | Car driver<br>(n=5 111) | Truck driver<br>(n=166) | Motorized<br>two-<br>wheelers<br>rider<br>(n=2 414) |                      | All (n=10<br>653) |                               |
|-------------------------------------|-----------------------|----------------------------|-----------------------------|------------------------------|----------------------|-------------------------|-------------------------|-----------------------------------------------------|----------------------|-------------------|-------------------------------|
|                                     | n (%)                 | n (%)                      | n (%)                       | n (%)                        | p-value <sup>1</sup> | n (%)                   | n (%)                   | n (%)                                               | p-value <sup>2</sup> |                   | p-value <sup>3</sup><br>(All) |
| <b>Sex</b>                          |                       |                            |                             |                              | <0.0001              |                         |                         |                                                     | <0.0001              |                   | <0.0001                       |
| Women                               | 312 (54.3)            | 664 (34.8)                 | 194 (45.2)                  | 10 (20.0)                    |                      | 2703 (52.9)             | 3 (1.8)                 | 277 (11.5)                                          |                      | 4163 (39.1)       |                               |
| Men                                 | 263 (45.7)            | 1244 (65.2)                | 235 (54.8)                  | 40 (80.0)                    |                      | 2408 (47.1)             | 163 (98.2)              | 2137 (88.5)                                         |                      | 6490 (60.9)       |                               |
| <b>Age categories</b>               |                       |                            |                             |                              | <0.0001              |                         |                         |                                                     | <0.0001              |                   | <0.0001                       |
| 18-24 years                         | 139 (24.2)            | 355 (18.6)                 | 94 (21.9)                   | 15 (30.0)                    |                      | 1208 (23.6)             | 27 (16.3)               | 678 (28.1)                                          |                      | 2516 (23.6)       |                               |
| 25-34 years                         | 140 (24.4)            | 636 (33.3)                 | 132 (30.8)                  | 15 (30.0)                    |                      | 1597 (31.2)             | 42 (25.3)               | 683 (28.3)                                          |                      | 3245 (30.5)       |                               |
| 35-44 years                         | 113 (19.6)            | 426 (22.3)                 | 108 (25.2)                  | 12 (24.0)                    |                      | 1149 (22.5)             | 39 (23.5)               | 499 (20.7)                                          |                      | 2346 (22.0)       |                               |
| 45-54 years                         | 108 (18.8)            | 331 (17.4)                 | 77 (17.9)                   | 4 (8.0)                      |                      | 832 (16.3)              | 34 (20.5)               | 388 (16.1)                                          |                      | 1774 (16.7)       |                               |
| 55-64 years                         | 69 (12.0)             | 157 (8.2)                  | 17 (4.0)                    | 4 (8.0)                      |                      | 317 (6.2)               | 21 (12.6)               | 164 (6.8)                                           |                      | 749 (7.0)         |                               |
| 65-70 years                         | 6 (1.0)               | 3 (0.2)                    | 1 (0.2)                     | 0 (0)                        |                      | 8 (0.2)                 | 3 (1.8)                 | 2 (0.1)                                             |                      | 23 (0.2)          |                               |
| <b>Type of work-related journey</b> |                       |                            |                             |                              | <0.0001              |                         |                         |                                                     | <0.0001              |                   | <0.0001                       |
| Commuting                           | 456 (79.3)            | 1742 (91.3)                | 410 (95.6)                  | 43 (86.0)                    |                      | 4565 (89.3)             | 35 (21.1)               | 2041 (84.5)                                         |                      | 9292 (87.2)       |                               |
| On duty                             | 119 (20.7)            | 166 (8.7)                  | 19 (4.4)                    | 7 (14.0)                     |                      | 546 (10.7)              | 131 (78.9)              | 373 (15.5)                                          |                      | 1361 (12.8)       |                               |
| <b>Opponent</b>                     |                       |                            |                             |                              | NA                   |                         |                         |                                                     | NA                   |                   | NA                            |
| None                                | 0 (0)                 | 909 (47.6)                 | 281 (65.5)                  | 26 (52.0)                    |                      | 548 (10.7)              | 48 (28.9)               | 1015 (42.1)                                         |                      | 2827 (26.5)       |                               |
| Pedestrian                          | 0 (0)                 | 29 (1.5)                   | 3 (0.7)                     | 1 (2.0)                      |                      | 7 (0.1)                 | 0 (0)                   | 11 (0.5)                                            |                      | 51 (0.5)          |                               |
| Other or unknown                    | 14 (2.4)              | 19 (1.0)                   | 4 (0.9)                     | 0 (0)                        |                      | 15 (0.3)                | 0 (0)                   | 11 (0.5)                                            |                      | 63 (0.6)          |                               |

|                                                           | Pedestrian<br>(n=575) | Bicycle rider<br>(n=1 908) | Scooter rider<br>(n=429) | Other PMD rider<br>(n=50) |                      | Car driver<br>(n=5 111) | Truck driver<br>(n=166) | Motorized two-wheelers rider<br>(n=2 414) |                      | All (n=10 653) |                               |
|-----------------------------------------------------------|-----------------------|----------------------------|--------------------------|---------------------------|----------------------|-------------------------|-------------------------|-------------------------------------------|----------------------|----------------|-------------------------------|
|                                                           | n (%)                 | n (%)                      | n (%)                    | n (%)                     | p-value <sup>1</sup> | n (%)                   | n (%)                   | n (%)                                     | p-value <sup>2</sup> |                | p-value <sup>3</sup><br>(All) |
| Car                                                       | 391 (68.0)            | 646 (33.9)                 | 87 (20.3)                | 16 (32.0)                 |                      | 3414 (66.8)             | 34 (20.5)               | 1139 (47.2)                               |                      | 5727 (53.8)    |                               |
| Fixed obstacle                                            | 0 (0)                 | 164 (8.6)                  | 31 (7.2)                 | 3 (6.0)                   |                      | 584 (11.4)              | 43 (25.9)               | 112 (4.6)                                 |                      | 937 (8.8)      |                               |
| Light commercial vehicle, truck, bus, train/tram, tractor | 66 (11.5)             | 63 (3.3)                   | 10 (2.3)                 | 1 (2.0)                   |                      | 517 (10.1)              | 40 (24.1)               | 85 (3.5)                                  |                      | 782 (7.3)      |                               |
| Motorized two-wheelers                                    | 52 (9.0)              | 21 (1.1)                   | 5 (1.2)                  | 1 (2.0)                   |                      | 23 (0.5)                | 1 (0.6)                 | 31 (1.3)                                  |                      | 134 (1.3)      |                               |
| Bicycle                                                   | 52 (9.0)              | 56 (2.9)                   | 8 (1.9)                  | 2 (4.0)                   |                      | 3 (0.1)                 | 0 (0)                   | 10 (0.4)                                  |                      | 131 (1.2)      |                               |
| Rollerblade, skateboard                                   | 0 (0)                 | 1 (0.05)                   | 0 (0)                    | 0 (0)                     |                      | 0 (0)                   | 0 (0)                   | 0 (0)                                     |                      | 1 (0)          |                               |
|                                                           |                       |                            |                          |                           |                      |                         |                         |                                           |                      |                |                               |
| <b>Lighting</b>                                           |                       |                            |                          |                           | 0.0009               |                         |                         |                                           | 0.5                  |                | 0.002                         |
| Day                                                       | 320 (65.4)            | 1067 (74.1)                | 218 (76.5)               | 31 (75.6)                 |                      | 3072 (70.7)             | 105 (73.4)              | 1401 (69.7)                               |                      | 6294 (71.0)    |                               |
| Night                                                     | 169 (34.6)            | 373 (25.9)                 | 67 (23.5)                | 10 (24.4)                 |                      | 1274 (29.3)             | 38 (26.6)               | 610 (30.3)                                |                      | 2567 (29.0)    |                               |
|                                                           |                       |                            |                          |                           |                      |                         |                         |                                           |                      |                |                               |
| <b>Month</b>                                              |                       |                            |                          |                           | <0.0001              |                         |                         |                                           | 0.0006               |                | <0.0001                       |
| January                                                   | 60 (10.4)             | 141 (7.4)                  | 32 (7.5)                 | 4 (8)                     |                      | 494 (9.7)               | 27 (16.3)               | 170 (7)                                   |                      | 928 (8.7)      |                               |
| February                                                  | 56 (9.7)              | 115 (6)                    | 22 (5.1)                 | 3 (6)                     |                      | 385 (7.5)               | 10 (6)                  | 172 (7.1)                                 |                      | 763 (7.2)      |                               |
| March                                                     | 49 (8.5)              | 122 (6.4)                  | 27 (6.3)                 | 4 (8)                     |                      | 421 (8.2)               | 10 (6)                  | 189 (7.8)                                 |                      | 822 (7.7)      |                               |
| April                                                     | 32 (5.6)              | 128 (6.7)                  | 29 (6.8)                 | 3 (6)                     |                      | 359 (7)                 | 6 (3.6)                 | 169 (7)                                   |                      | 726 (6.8)      |                               |
| May                                                       | 30 (5.2)              | 149 (7.8)                  | 34 (7.9)                 | 3 (6)                     |                      | 367 (7.2)               | 12 (7.2)                | 168 (7)                                   |                      | 763 (7.2)      |                               |
| June                                                      | 52 (9)                | 180 (9.4)                  | 45 (10.5)                | 5 (10)                    |                      | 479 (9.4)               | 15 (9)                  | 239 (9.9)                                 |                      | 1015 (9.5)     |                               |
| July                                                      | 38 (6.6)              | 193 (10.1)                 | 50 (11.7)                | 9 (18)                    |                      | 419 (8.2)               | 21 (12.6)               | 223 (9.2)                                 |                      | 953 (8.9)      |                               |
| August                                                    | 27 (4.7)              | 131 (6.9)                  | 23 (5.4)                 | 3 (6)                     |                      | 254 (5)                 | 10 (6)                  | 141 (5.8)                                 |                      | 589 (5.5)      |                               |
| September                                                 | 41 (7.1)              | 246 (12.9)                 | 46 (10.7)                | 7 (14)                    |                      | 436 (8.5)               | 12 (7.2)                | 255 (10.6)                                |                      | 1043 (9.8)     |                               |
| October                                                   | 64 (11.1)             | 199 (10.4)                 | 37 (8.6)                 | 4 (8)                     |                      | 518 (10.1)              | 12 (7.2)                | 258 (10.7)                                |                      | 1092 (10.3)    |                               |



|                   | Pedestrian<br>(n=575) | Bicycle rider<br>(n=1 908) | Scooter rider<br>(n=429) | Other PMD rider<br>(n=50) |                      | Car driver<br>(n=5 111) | Truck driver<br>(n=166) | Motorized two-wheelers rider<br>(n=2 414) |                      | All (n=10 653) |                               |
|-------------------|-----------------------|----------------------------|--------------------------|---------------------------|----------------------|-------------------------|-------------------------|-------------------------------------------|----------------------|----------------|-------------------------------|
|                   | n (%)                 | n (%)                      | n (%)                    | n (%)                     | p-value <sup>1</sup> | n (%)                   | n (%)                   | n (%)                                     | p-value <sup>2</sup> |                | p-value <sup>3</sup><br>(All) |
| November          | 72 (12.5)             | 179 (9.4)                  | 41 (9.6)                 | 5 (10)                    |                      | 536 (10.5)              | 14 (8.4)                | 218 (9)                                   |                      | 1065 (10.0)    |                               |
| December          | 54 (9.4)              | 125 (6.6)                  | 43 (10)                  | 0 (0)                     |                      | 443 (8.7)               | 17 (10.2)               | 212 (8.8)                                 |                      | 894 (8.4)      |                               |
| <b>Season</b>     |                       |                            |                          |                           | 0.0003               |                         |                         |                                           | 0.002                |                | <0.0001                       |
| Spring            | 111 (19.3)            | 399 (20.9)                 | 90 (21)                  | 10 (20)                   |                      | 1147 (22.4)             | 28 (16.8)               | 526 (21.8)                                |                      | 2311 (21.7)    |                               |
| Summer            | 117 (20.3)            | 504 (26.4)                 | 118 (27.6)               | 17 (34)                   |                      | 1152 (22.6)             | 46 (27.6)               | 603 (24.9)                                |                      | 2557 (24.0)    |                               |
| Autunm            | 177 (30.7)            | 624 (32.7)                 | 124 (28.9)               | 16 (32)                   |                      | 1490 (29.1)             | 38 (22.8)               | 731 (30.3)                                |                      | 3200 (30.0)    |                               |
| Winter            | 170 (29.5)            | 381 (20)                   | 97 (22.6)                | 7 (14)                    |                      | 1322 (25.9)             | 54 (32.5)               | 554 (22.9)                                |                      | 2585 (24.3)    |                               |
| <b>Urban area</b> |                       |                            |                          |                           | <0.0001              |                         |                         |                                           | <0.0001              |                | <0.0001                       |
| Lyon              | 205 (35.6)            | 1257 (65.9)                | 325 (75.8)               | 26 (52.0)                 |                      | 730 (14.3)              | 15 (9.0)                | 700 (29.0)                                |                      | 3258 (30.6)    |                               |
| Grand Lyon        | 220 (38.3)            | 498 (26.1)                 | 77 (17.9)                | 18 (36.0)                 |                      | 2068 (40.5)             | 72 (43.4)               | 886 (36.7)                                |                      | 3839 (36.0)    |                               |
| Hors Grand Lyon   | 66 (11.5)             | 88 (4.6)                   | 10 (2.3)                 | 2 (4.0)                   |                      | 1375 (26.9)             | 53 (31.9)               | 388 (16.1)                                |                      | 1982 (18.6)    |                               |
| Rhône SAP         | 84 (14.6)             | 65 (3.4)                   | 17 (4.0)                 | 4 (4.0)                   |                      | 938 (18.3)              | 26 (15.7)               | 440 (18.2)                                |                      | 1574 (14.8)    |                               |

1 Comparison of pedestrian, bicycle rider, scooter rider and other PMD rider

2 Comparison of car driver, truck driver, and Motorized two-wheelers rider

3 Comparison of the 7 categories of injured users

Table 2: Injury characteristics of victims injured in work-related crash, by user category (source the Rhône Road Trauma Registry, 2015-2020)

|                                                 | Pedestrian<br>(n=575) | Bicycle rider<br>(n=1908) | Scooter rider<br>(n=429) | Other PMD<br>rider<br>(n=50) |                      | Car driver<br>(n=5111) | Truck driver<br>(n=166) | Motorized<br>two-<br>wheelers<br>rider<br>(n=2414) |                      | All<br>(n=10<br>653) |                      |
|-------------------------------------------------|-----------------------|---------------------------|--------------------------|------------------------------|----------------------|------------------------|-------------------------|----------------------------------------------------|----------------------|----------------------|----------------------|
|                                                 | n (%)                 | n (%)                     | n (%)                    | n (%)                        | p-value <sup>1</sup> | n (%)                  | n (%)                   | n (%)                                              | p-value <sup>2</sup> |                      | p-value <sup>3</sup> |
| <b>Hospitalization</b>                          | 80 (13.9)             | 156 (8.2)                 | 38 (8.9)                 | 6 (12.0)                     | 0.0005               | 216 (4.2)              | 29 (17.5)               | 301 (12.5)                                         | <0.0001              | 826 (7.8)            | <0.0001              |
| <b>Death</b>                                    | 3 (0.5)               | 2 (0.1)                   | 1 (0.2)                  | 0 (0)                        | NA                   | 2 (0.1)                | 1 (0.6)                 | 3 (0.1)                                            | NA                   | 12 (0.1)             | NA                   |
| <b>Number of injuries</b>                       |                       |                           |                          |                              | 0.0001               |                        |                         |                                                    | <0.0001              |                      | <0.0001              |
| 1                                               | 186 (32.3)            | 759 (39.8)                | 163 (38.0)               | 25 (50.0)                    |                      | 2414 (47.2)            | 66 (39.8)               | 854 (35.4)                                         |                      | 4467<br>(41.9)       |                      |
| 2                                               | 183 (31.8)            | 601 (31.5)                | 146 (34.0)               | 13 (26.0)                    |                      | 1685 (33.0)            | 54 (32.5)               | 853 (35.3)                                         |                      | 3535<br>(33.2)       |                      |
| 3                                               | 129 (22.4)            | 410 (21.5)                | 76 (17.7)                | 8 (16.0)                     |                      | 760 (14.9)             | 31 (18.7)               | 483 (20.0)                                         |                      | 1897<br>(17.8)       |                      |
| 4+                                              | 77 (13.4)             | 138 (7.2)                 | 44 (10.3)                | 4 (8.0)                      |                      | 252 (4.9)              | 15 (9.0)                | 224 (9.3)                                          |                      | 754 (7.1)            |                      |
| <b>MAIS</b>                                     |                       |                           |                          |                              | NA                   |                        |                         |                                                    | NA                   |                      | NA                   |
| 1 Minor                                         | 451 (78.4)            | 1433 (75.1)               | 315 (73.4)               | 37 (74.0)                    |                      | 4830 (94.5)            | 138 (83.1)              | 1790 (74.1)                                        |                      | 8994<br>(83.5)       |                      |
| 2 Moderate                                      | 86 (15.0)             | 428 (22.4)                | 105 (24.5)               | 9 (18.0)                     |                      | 223 (4.4)              | 22 (13.2)               | 516 (21.4)                                         |                      | 1389<br>(12.9)       |                      |
| 3 Serious                                       | 21 (3.6)              | 37 (1.9)                  | 6 (1.4)                  | 3 (0.6)                      |                      | 44 (0.8)               | 4 (2.4)                 | 86 (3.6)                                           |                      | 201 (1.9)            |                      |
| 4 Severe                                        | 13 (2.3)              | 8 (0.4)                   | 2 (0.5)                  | 0 (0)                        |                      | 10 (0.2)               | 2 (1.2)                 | 14 (0.6)                                           |                      | 49 (0.4)             |                      |
| 5 Critical                                      | 3 (0.5)               | 2 (0.1)                   | 0 (0)                    | 1 (2.0)                      |                      | 4 (0.1)                | 0 (0)                   | 8 (0.3)                                            |                      | 18 (0.2)             |                      |
| 6 Maximum                                       | 1 (0.2)               | 0 (0)                     | 1 (0.2)                  | 0 (0)                        |                      | 0 (0)                  | 0 (0)                   | 0 (0)                                              |                      | 2 (0)                |                      |
| <b>MAIS3+</b>                                   | 38 (6.6)              | 47 (2.5)                  | 9 (2.1)                  | 4 (8.0)                      | <0.0001              | 58 (1.1)               | 6 (3.6)                 | 108 (4.5)                                          | <0.0001              | 270 (2.5)            | <0.0001              |
| <b>Head injury</b>                              | 118 (20.5)            | 295 (15.5)                | 77 (17.9)                | 5 (10.0)                     | 0.02                 | 821 (16.1)             | 44 (26.5)               | 198 (8.2)                                          | <0.0001              | 1558<br>(14.5)       | <0.0001              |
| <b>Global gravity of head injury<br/>MAIS3+</b> | 11 (9.3)              | 12 (4.1)                  | 2 (2.6)                  | 1 (20.0)                     |                      | 15 (1.8)               | 1 (2.3)                 | 8 (4.0)                                            |                      | 50 (3.2)             | <0.0001              |
| <b>Face injury</b>                              | 73 (12.7)             | 315 (16.5)                | 91 (21.2)                | 7 (14.0)                     | 0.004                | 279 (5.5)              | 17 (10.2)               | 94 (3.9)                                           | 0.0001               | 876 (8.1)            | <0.0001              |

|                                               | Pedestrian<br>(n=575) | Bicycle rider<br>(n=1908) | Scooter rider<br>(n=429) | Other PMD<br>rider<br>(n=50) |                      |  | Car driver<br>(n=5111) | Truck driver<br>(n=166) | Motorized<br>two-<br>wheelers<br>rider<br>(n=2414) |                      | All<br>(n=10<br>653) |                      |
|-----------------------------------------------|-----------------------|---------------------------|--------------------------|------------------------------|----------------------|--|------------------------|-------------------------|----------------------------------------------------|----------------------|----------------------|----------------------|
|                                               | n (%)                 | n (%)                     | n (%)                    | n (%)                        | p-value <sup>1</sup> |  | n (%)                  | n (%)                   | n (%)                                              | p-value <sup>2</sup> |                      | p-value <sup>3</sup> |
| Global gravity of face injury<br>MAIS3+       | 3 (4.0)               | 1 (0.3)                   | 0 (0)                    | 0 (0)                        |                      |  | 0 (0)                  | 0 (0)                   | 0 (0)                                              | NA                   | 4 (0.4)              |                      |
| Neck injury                                   | 34 (5.9)              | 53 (2.8)                  | 18 (4.2)                 | 0 (0)                        | 0.002                |  | 791 (15.5)             | 23 (23.9)               | 77 (3.2)                                           | <0.0001              | 996 (9.2)            | <0.0001              |
| Global gravity of neck injury<br>MAIS3+       | 1 (3.0)               | 0 (0)                     | 0 (0)                    | 0 (0)                        |                      |  | 1 (0.1)                | 0 (0)                   | 1 (1.3)                                            |                      | 3 (0.3)              |                      |
| Chest injury                                  | 67 (11.6)             | 169 (8.9)                 | 35 (8.2)                 | 1 (2.0)                      | 0.04                 |  | 740 (14.5)             | 26 (15.7)               | 270 (11.2)                                         | 0.0003               | 1308<br>(12.1)       | <0.0001              |
| Global gravity of chest injury<br>MAIS3+      | 16 (23.9)             | 14 (8.3)                  | 5 (14.3)                 | 0 (0)                        |                      |  | 31 (4.2)               | 5 (19.2)                | 52 (19.3)                                          |                      | 123 (9.4)            |                      |
| Abdomen injury                                | 33 (5.7)              | 47 (2.5)                  | 13 (3.0)                 | 0 (0)                        | 0.0006               |  | 148 (2.9)              | 6 (3.6)                 | 113 (4.7)                                          | 0.0004               | 360 (3.3)            | <0.0001              |
| Global gravity of Abdomen<br>injury MAIS3+    | 8 (24.2)              | 6 (12.8)                  | 0 (0)                    | 0 (0)                        |                      |  | 12 (8.1)               | 1 (16.7)                | 8 (7.1)                                            |                      | 35 (9.7)             |                      |
| Spinal injury                                 | 119 (20.7)            | 198 (10.4)                | 39 (9.1)                 | 4 (8.0)                      | <0.0001              |  | 3114 (60.9)            | 70 (42.2)               | 373 (15.4)                                         | <0.0001              | 3917<br>(36.4)       | <0.0001              |
| Global gravity of Spinal injury<br>MAIS3+     | 0 (0)                 | 2 (1.0)                   | 0 (0)                    | 0 (0)                        |                      |  | 6 (0.2)                | 1 (1.4)                 | 5 (1.3)                                            |                      | 14 (0.4)             |                      |
| Upper limb injury                             | 230 (40.0)            | 1086 (56.9)               | 254 (59.2)               | 24 (48.0)                    | <0.0001              |  | 1121 (21.9)            | 55 (33.1)               | 1161 (48.1)                                        | <0.0001              | 3931<br>(36.5)       | <0.0001              |
| Global gravity of Upper limb<br>injury MAIS3+ | 1 (0)                 | 2 (0.2)                   | 0 (0)                    | 0 (0)                        |                      |  | 3 (0.3)                | 1 (1.8)                 | 5 (0.4)                                            |                      | 12 (0.3)             |                      |

|                                                                    | Pedestrian<br>(n=575) | Bicycle rider<br>(n=1908) | Scooter rider<br>(n=429) | Other PMD<br>rider<br>(n=50) |                      | Car driver<br>(n=5111) | Truck driver<br>(n=166) | Motorized<br>two-<br>wheelers<br>rider<br>(n=2414) |                      | All<br>(n=10<br>653) |                      |
|--------------------------------------------------------------------|-----------------------|---------------------------|--------------------------|------------------------------|----------------------|------------------------|-------------------------|----------------------------------------------------|----------------------|----------------------|----------------------|
|                                                                    | n (%)                 | n (%)                     | n (%)                    | n (%)                        | p-value <sup>1</sup> | n (%)                  | n (%)                   | n (%)                                              | p-value <sup>2</sup> |                      | p-value <sup>3</sup> |
| <b>Injury of the lower limbs / pelvis</b>                          | 395 (68.7)            | 899 (47.1)                | 201 (46.8)               | 26 (52.0)                    | <0.0001              | 750 (14.7)             | 45 (27.1)               | 1653 (68.5)                                        | <0.0001              | 3969 (36.8)          | <0.0001              |
| <b>Global gravity of Injury of the lower limbs / pelvis MAIS3+</b> | 18 (4.6)              | 23 (2.6)                  | 4 (2.0)                  | 3 (11.5)                     |                      | 17 (2.3)               | 1 (2.2)                 | 49 (3.0)                                           |                      | 115 (2.9)            |                      |
| <b>New Injury Severity Score (NISS)</b>                            |                       |                           |                          |                              | <0.0001              |                        |                         |                                                    | <0.0001              |                      | <0.0001              |
| NISS < 9                                                           | 523 (91.0)            | 1824 (95.6)               | 413 (96.3)               | 45 (90.0)                    |                      | 5024 (98.3)            | 153 (92.2)              | 2241 (92.8)                                        |                      | 10343                |                      |
| NISS = [9–15]                                                      | 21 (3.6)              | 62 (3.2)                  | 10 (2.3)                 | 4 (8.0)                      |                      | 49 (1.0)               | 8 (4.8)                 | 112 (4.6)                                          |                      | 266 (2.5)            |                      |
| NISS ≥ 16                                                          | 31 (5.4)              | 22 (1.2)                  | 6 (1.4)                  | 1 (2.0)                      |                      | 38 (0.7)               | 5 (3.0)                 | 61 (2.5)                                           |                      | 164 (1.5)            |                      |

1 Comparison of pedestrian, bicycle rider, scooter rider and other PMD rider

2 Comparison of car driver, truck driver, and Motorized two-wheelers rider

3 Comparison of the 7 categories of injured users

Figure 1 : Flow chart

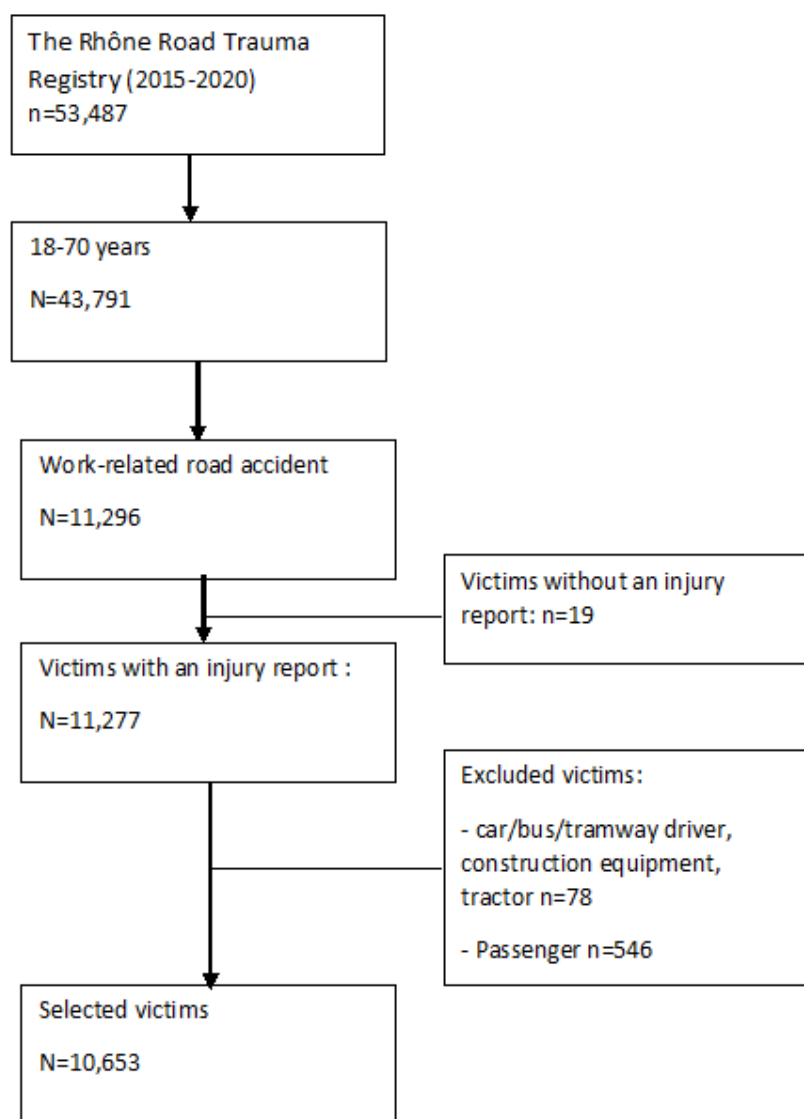

Figure 2 : Trends in the number of drivers, riders and pedestrians involved in work-related road crashes, by type of journey between 2015 and 2020 (source the Rhône Road Trauma Registry)

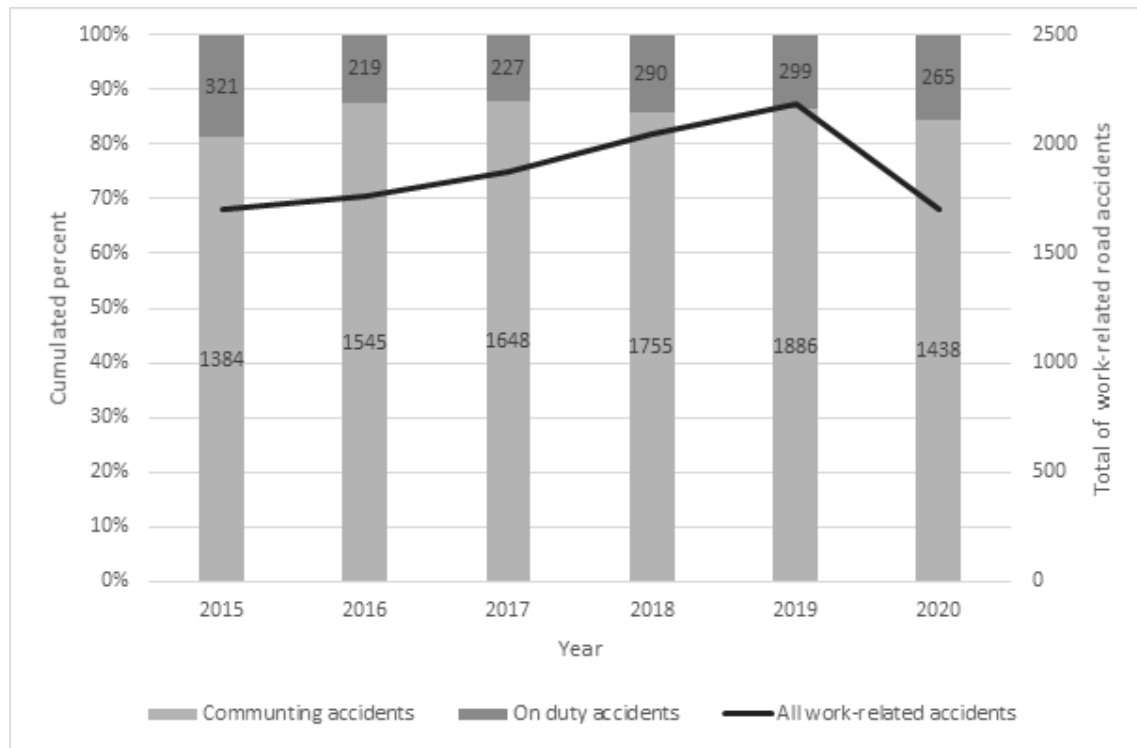

Figure 3 : Frequencies (and numbers) of different user categories of drivers, riders and pedestrians injured in work-related crashes, by year (source the Rhône Road Trauma Registry, 2015-2020)

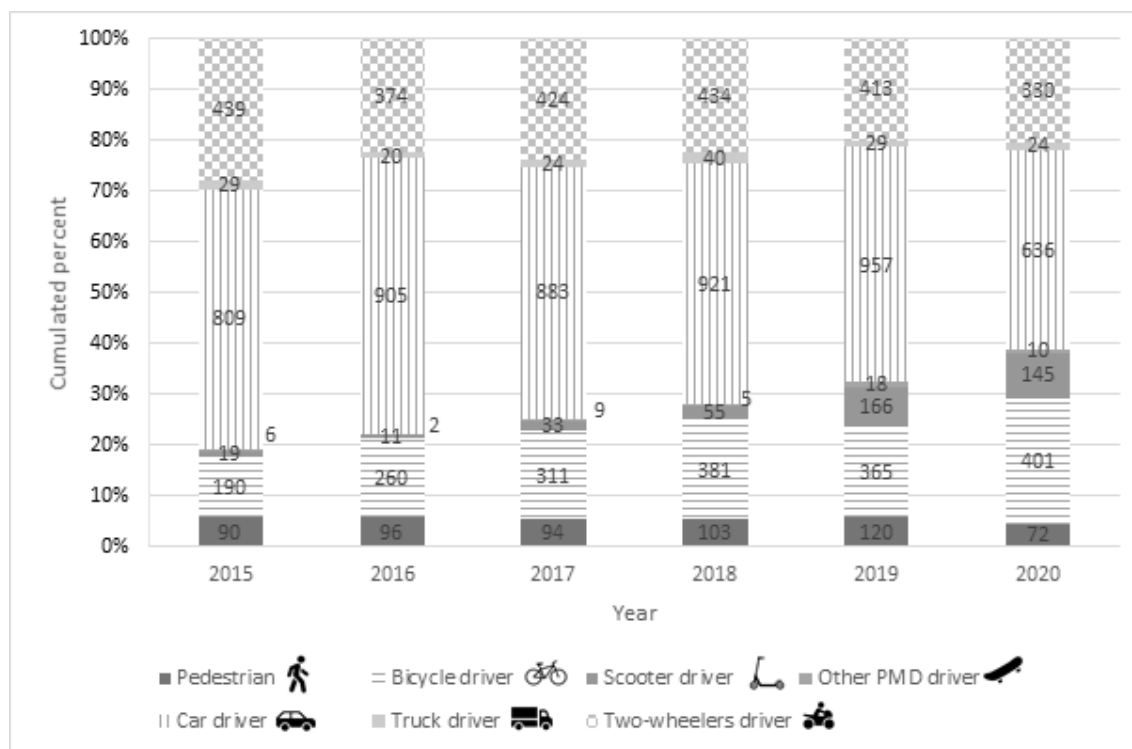

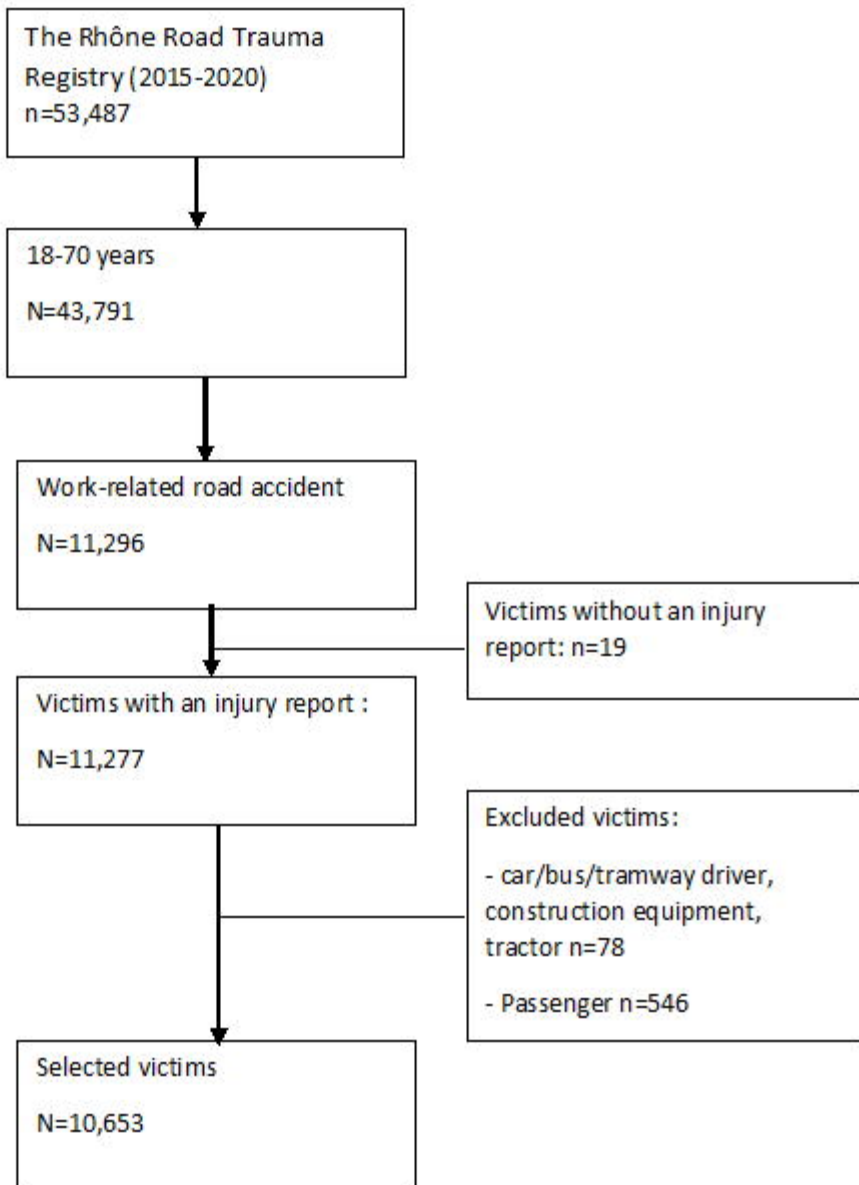



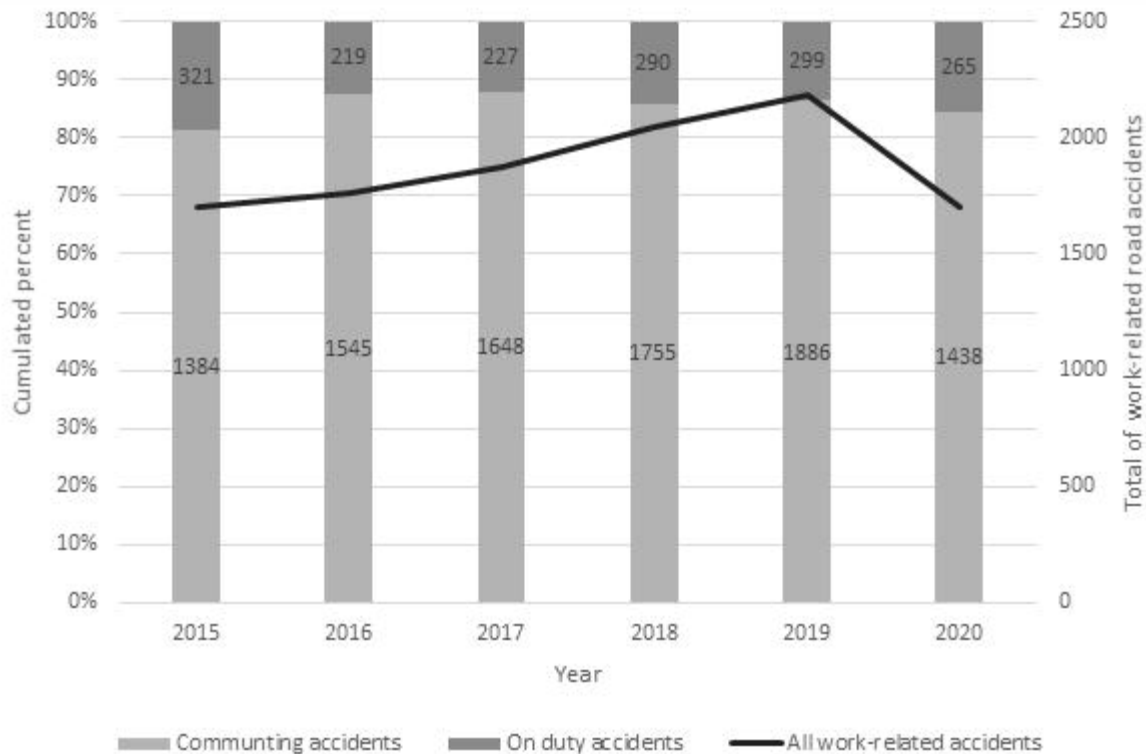

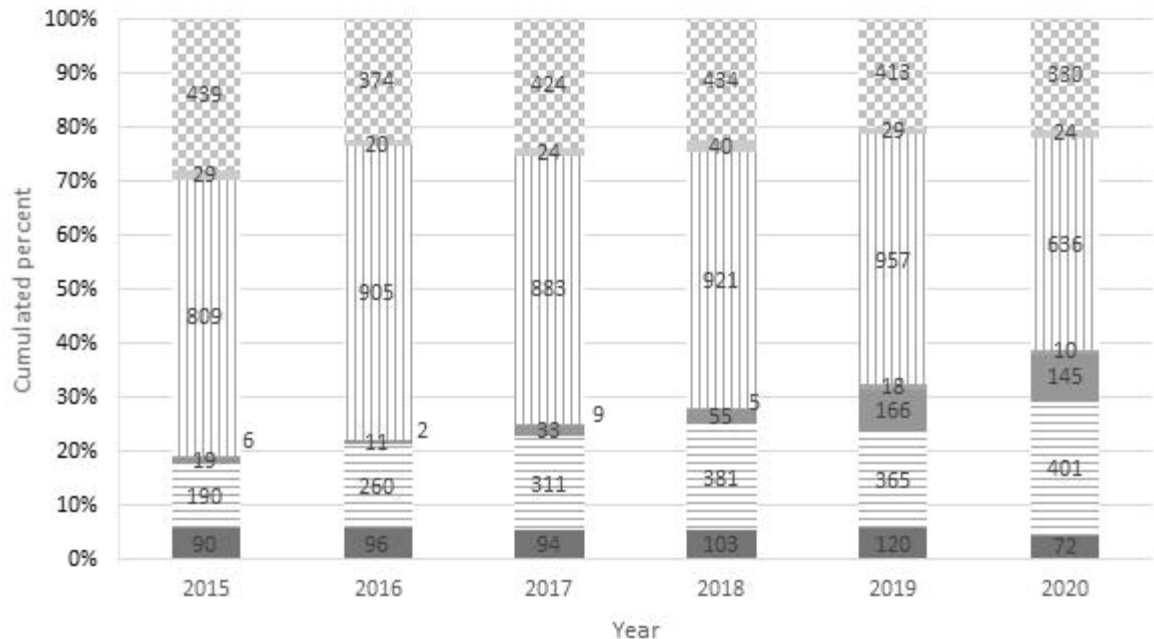

■ Pedestrian 

▨ Bicycle driver 

■ Scooter driver 

■ Other PMD driver 

▨ Car driver 

■ Truck driver 

○ Two-wheelers driver 

Source: https://​​​www.medrxiv.org/content/10.1101/2024.04.04.24305326v2.full.pdf
